# Supplementary material for: Spt6 is a maintenance factor for centromeric CENP-A
Source: Springer Nature journal article supplement (doi:10.1038/s41467-020-16695-7), 2020-06-10
Supplement: MOESM3 [file 41467_2020_16695_MOESM3_ESM.pdf › 41467_2020_16695_MOESM3_ESM.pdf]

## Supplemental information – Table 1: Primers, Plasmids and gBlocks

### Primers and sgRNAs

|                  |                                                  |
|------------------|--------------------------------------------------|
|                  | Cloning primers                                  |
| dSpt6_F1         | TCCGACTAGTATGGCCGAATTTCTGGAATCCGA                |
| dSpt6_R2         | GCATGATATCGTTCTCGTCGTAGAGGGGCGT                  |
| 1kup_F_BstZ17I   | ATAGTATACCAACAACAGGAGCACCGGACAC                  |
| 2kup_R_NheI      | CGAGCTAGCAATATAATGGAATAAAGCTTAACCTAATAATAAAGTGCG |
| dSpt6_R-Ascl     | ATATGGCGCGCCTAGATGTTCTCGTCGTAGAGGGGCGT           |
| T2A_CD4_E1_F     | CCGGAATTCGAGGGCAGAGGAAGTCTTCTAACATGCG            |
| T2A_CD4_B1_R     | AAAGGATCCCTAGCCGGTGTGGCGGCACCTGA                 |
|                  |                                                  |
|                  | RNAi primers                                     |
| White fw (RNAi)  | TTAATACGACTCACTATAGGGACTGCTCAATGGCCAACCTGTGGAC   |
| White rev (RNAi) | TTAATACGACTCACTATAGGGCCTCGGCCATCAGAAGGATCTTGTC   |
| Spt6_F(RNAi)     | TTAATACGACTCACTATAGGGATGCCGGGCAAGTTCCTGCTGTCCTA  |
| Spt6_R(RNAi)     | TTAATACGACTCACTATAGGGGGCGTCATGAACGGAGTCTGTCCAC   |
| CID fw (RNAi)    | TTAATACGACTCACTATAGGGAGACCGTCGGCGAACAACCTCAAAGT  |
| CID rev (RNAi)   | TTAATACGACTCACTATAGGGAGAAGCCGCTGCGTCAAGTACATCTC  |
| Neg9             | UACGACCGGUCUAUCGUAGTT                            |
|                  |                                                  |
|                  | sgRNA primers                                    |
| dU6_2_sgRNA_F    | GTTCTGACTTGCAGCCTGAAATACGGCACG                   |
| dU6_2_3_sgRNA_R  | AAAAAAGCACCGACTCGGTGCCACTTTTTCAAGTTGATAA         |
| Spt6_sgRNA_5_fw  | TTCGTGACGACTTCTCAAAGTACG                         |
| Spt6_sgRNA_5_rev | AACCGTACTTTGAGAAGTCGTCC                          |
| Spt6_sgRNA_9_fw  | TTCGGTTACGATTCCGATGGCGT                          |
| Spt6_sgRNA_9_rev | AACACGCCATCGGAATCGTAACC                          |
|                  | Primers for Site-Directed Mutagenesis            |
| S20A_F           | CAACTCAAAGgCGCCGAACGACG                          |
| S20A_R           | TTCGCCGACGGCCTGGGT                               |
| S75A_F           | GAGAGACAGCgCCACCACTGGCG                          |
| S75A_R           | GCTGCCGGCTGCCTCCGT                               |
| S77A_F           | CAGCTCCACCgcTGGCGAGGAGGAGGACC                    |
| S77A_R           | TCTCTCGCTGCCGGCTGC                               |
| B75AM77A_F       | CAGCgCCACCgcTGGCGAGGAGGAGGAC                     |
| S20D_F           | CAACTCAAAGgacCCGAACGACGACGACACGGCC               |

|            |                                      |
|------------|--------------------------------------|
| S20D_R     | TTCGCCGACGGCCTGGGT                   |
| S75A_F     | GAGAGACAGCgaCACCAGTGGCGAGGAGGAGG     |
| S75A_R     | GCTGCCGGCTGCCTCCGT                   |
| S77D_F     | CAGCTCCACCgacGGCGAGGAGGAGGACC        |
| S77D_R     | TCTCTCGCTGCCGGCTGC                   |
| B75DM77D_F | CGAGAGACAGCgacACCgacGGCGAGGAGGAGGACC |
| B75DM77D_R | GGTCCTCCTCCTCGCCgtcGGTGTCTGTCTCTCG   |

### Plasmids:

|                                         |                                       |
|-----------------------------------------|---------------------------------------|
| pMT-CID-GFP-hygro                       | Heun et al., 2006 <sup>1</sup>        |
| pMT-Spt6-GFP-hygro                      | This study                            |
| pIB-resSpt6-stop                        | This study                            |
| pMT_FKBP_L106P_Fbox_GFPbinder_hygro_opt | This study                            |
| pMT-CID-HA-ERT2_kana_opt                | This study                            |
| pRITE_MT_CID_V5_puro_3myc_CD4           | This study                            |
| 1kup_resGFPSpt6_stop                    | This study                            |
| pIB_Cas9_CD4_Blast                      |                                       |
| pET-His6-Sumo_Spt6199-338               | This study                            |
| pET22b_H3                               | gift from K. Luger                    |
| pET22b_H4                               | gift from K. Luger                    |
| pMT-SNAP-CENP-A                         | Boltengagen et al., 2016 <sup>2</sup> |
| pMT-SNAP-CENP-A_S77D                    | This study                            |
| pMT-SNAP-CENP-A_S20/75/77D              | This study                            |

### gBlocks

resGFPSpt6\_HindIII\_Eco47III

GTAAAGCTTTATTCCATTATATTGCTAGTTATGGCCGAATTTCTGGACTCCGA  
GGCGGAAGAATCGGAGGAGGAGGAAGAATTGGACGTCAACGAGCGCAAGA  
GACTCAAGAACTGAAAGCAGCCGTCTCCGATAGTAGCGAAGAAGAAGAAG  
GTGAGTTTTTCCACTGGAGCCGCTGAAGGCGCGTACAAATACATACATACAT  
ACATACGTATGTGGCGATCTCTGGCGGGTTTTTCACCCCTCTCACCAGGCG  
CGCCAGATCCACACATGGTGAGCAAGGGCGAGGAGCTGTTACCGGGGTG  
GTGCCCATCCTGGTCGAGCTGGACGGCGACGTAAACGGCCACAAGTTCAG  
CGTGTCCGGCGAGGGCGAGGGCGATGCCACCTACGGCAAGCTGACCCTG

AAGTTCATCTGCACCACCGGCAAGCTGCCCGTGCCCTGGCCCACCCTCGT  
GACCACCCTGACCTACGGCGTGCAAGTGCCTTCAGCCGCTACCCCGACCACA  
TGAAGCAGCACGACTTCTTCAAGTCCGCCATGCCCGAAGGCTACGTCCAGG  
AGCGCACCATCTTCTTCAAGGACGACGGCAACTACAAGACCCGCGCCGAG  
GTGAAGTTCGAGGGGCGACACCCTGGTGAACCGCATCGAGCTGAAGGGCAT  
CGACTTCAAGGAGGACGGCAACATCCTGGGGCACAAGCTGGAGTACAAC  
ACAACAGCCACAACGTCTATATCATGGCCGACAAGCAGAAGAACGGCATCA  
AGGTGAACTTCAAGATCCGCCACAACATCGAGGACGGCAGCGTGCAGCTC  
GCCGACCCTACCAGCAGAACACCCCATCGGGCAGCGCCCCGTGCTGCT  
GCCCCGACAACCACTACCTGAGCACCCAGTCCGCCCTGAGCAAAGACCCCA  
ACGAGAAGCGCGATCACATGGTCTGCTGGAGTTCGTGACCGCCGCTCG  
ACTCGAGGTACCTGGTAACAGTTTTTCAGTTGCATATGTATATCTGCGGCTAC  
AATGAAGGTAAAAGGTAAACCGATATTCTTATTGCCCTATTCCGTAGACGAC  
GAGGAACGGCTGCGCGAAGAGCTCAAAGATCTGATCGACGACAATCCCATC  
GAGGAGGACGATGGCAGTG**GTTACGATTCCGACGGAGT**GGGCAGCGGCAA  
GAAGCGCAAAAAACATGAAGACGACGATCTGGACGATCGACTGGAGGACG  
ACGACTACGATCTTATCGAGGAGAATCTGGGCGTCAAAGTCGAGAGACGGA  
AGCGGTTCAAGCGTCTGCGTCGCATCCACGACAACGAAAGCGATGGCGAG  
GAGCAGCACGTGGACGAGGGTCTGGTGCCTGAGCAGATTGCTGAACAATT  
GTTTCGACGAGAACGATGAGAGCATTGGTCATCGCAGCGAGCGCAGTCACA  
GGGAGGCGGACGACTACGACGACGTGGATACGGAGTCGGACGCAGATGA  
CTTCATTGTGGACGATAATGGGCGTCCCATAGCCGAGAAGAAGAAGAAACG  
GCGCCCCATCTTTACAGACGCATCACTGCAGGAAGGTCAGGACATCTTTGG  
CGTAGACTTCGACTAT**GACGACTTCTCAAATATG**AAGAAGACGACTACGAA  
GATGACTCGGAAGGAGATGAGTACGATGAGGATCTGGGCGTCGGCGATGA  
TACGCGCGTCAAGAAGAAGAAAGCGCTCAA

GFP, Mutated sgRNA9 and sgRNA5 target regions (respectively)

dSpt6\_199-338\_Ecoli\_codopt\_biobrick\_IDT

**TACTTCCAATCCAATGCA**ATGACCGATGCGTCTCTGCAAGAAGGTCAAGATA  
TTTTTGGCGTGGATTTTGATTATGATGATTTAGCAAATATGAAGAAGACGAT  
TATGAAGATGACAGCGAAGGCGATGAATATGATGAAGATCTGGGCGTGGGC  
GACGATACCCGCGTGAAAAAGAAGAAAGCGCTGAAAAAGAAAGTGGTGAAG  
AAAACCATTTTTGATATTTATGAACCGAGCGAACTGAAACGCGGCCATTTTA  
CCGATATGGATAACGAAATTCGCAAAACCGATATTCCGGAACGCATGCAGC  
TGCGCGAAGTGCCGGTGACCCCGGTGCCGGAAGGCAGCGATGAACTGGAT  
CTGGAAGCGGAATGGATTTATAAATATGCGTTTTGCAAACATACCGTGAGCG  
AACAGGAAAAACCGGAAAGCCGCGAAAAAT**TAATAACATTGGAAGTGGATAA**

Biobrick

FKBP\_L106P degron

AAAGGTACCAAC**ATGGGTGTGCAGGTTGAGACGATCTCGCCCGGTGATGGT**  
**CGCACCTTCCCAAGCGTGGACAGACCTGCGTGGTCCATTACACTGGCATG**  
**CTGGAGGATGGTAAGAAGGTGGACTCCTCGCGTGACCGTAACAAGCCATTC**

AAGTTCATGCTGGGCAAGCAGGAGGTGATTGCGGGTTGGGAGGAGGGTGT  
CGCCCAGATGTCCGTGGGCCAACGCGCCAAGCTGACCATCAGCCCAGACT  
ATGCTTACGGCGCCACTGGACACCCCGGTATCATCCACCCACGCCACCT  
TGGTGTTCGACGTGGAGCTGCTGAAGCCGGAGGGCGGAGGCAGCGGAGG  
TGGAAGCTCCGGCGGACTAGTAAC

FKBP\_L106P

F-box-GFP binder

TCCACTAGTAACGGCCGCCAGTGTGCTGGAATTCAAATGATGAAAATGGA  
GACTGACAAAATAATGGACGAAACCAACTCCAATGCACAGGCCTTCACAAC  
CACTATGCTGTACGACCCGGTGCGCAAGAAAGACTCATCGCCACCTACCA  
AACGGAGCGGGAACCTCTGCTTTCAGTACTTCACCCAGTGGAGCGAGTCGG  
GCCAGGTGGACTTTGTGGAGCACCTGCTGTGCGCATGTGCCACTATCAAC  
ACGGACAGATCAATGCCTATCTCAAGCCGATGCTCCAGCGGGACTTTATCA  
CATTGCTGCCAATCAAGGGTCTGGATCACATCGCAGAAAACATTTTGTGTA  
CTTGGATGCCGAATCGCTCAAATCATCCGAGCTGGTCTGCAAGGAATGGCT  
GCGCGTCATTTCCGAGGGCATGCTCTGGAAGAAGCTCATCGAACGCAAGGT  
GCGCACAGATTCTTGTGGCGCGGACTGGCCGAGCGGCGTAATTGGATGC  
AGTACCTCTTCAAGCCAAGACCGGGCCAGACTCAACGGCCACACTCATTCC  
ATCGCGAGTTGTTCCCAAGATAATGAATGACATTGACAGCATAGAGAACAA  
CTGGCGGACTGGCCGCCACCTCGAGATGGATCAAGTCCAACCTGGTGGAGT  
CTGGTGGCGCTTTGGTGCAGCCAGGTGGCTCTCTGCGTTTGTCTGTGCCG  
CTTCTGGCTTCCCAGTGAACCGCTATTCCATGCGCTGGTATCGCCAGGCTC  
CAGGCAAAGAGCGTGAGTGGGTAGCCGGTATGTCCAGCGCGGGTGATCGT  
AGCTCCTATGAAGACTCCGTGAAGGGCCGTTTCACCATCAGCCGTGACGAT  
GCCCGTAACACGGTGTATCTGCAAATGAACAGCTTGAAACCTGAAGATACG  
GCCGTGTATTACTGTAATGTGAACGTGGGCTTCGAGTATTGGGGCCAAGGC  
ACCCAGGTCACCGTCTCCAGCTAATCTAGAGGG

NSImb (Fbox protein), GFP binder (GBP)

**DNA sequences assembled from multiple gBlocks and PCR products**

pRITE

AGTGGCGGCCGCTCGAGCGGTGGCTCCGGCGGAAGCATAACTTCGTATAA  
TGTATGCTATACGAAGTTATCACCGCGGTTCGAAAGTAAGCCTATCCCTAAC  
CCTCTCCTCGGTCTCGATTCTACCCGTACCGGTGAGGGCAGAGGAAGTCTT  
CTAACATGCGGTGACGTGGAGGAGAATCCCGGCCCTGCCAGCGGTAGCGG  
CAGCGGCAACATGACCGAGTACAAGCCCACCGTGCGTCTGGCCACCCGTG  
ACGATGTGCCACGTGCCGTTTCGACCCCTGGCCGCCGCCTTCGCCGACTAT  
CCAGCCACCCGTACACCGTGGACCCAGATCGCCACATCGAGCGTGTAC  
TGAGCTGCAGGAGCTGTTCTGACCCGCGTTGGTCTGGACATCGGCAAGG  
TGTGGGTGGCTGACGATGGCGCTGCCGTGGCTGTGTGGACTACCCAGAA  
TCCGTGGAGGCCGGAGCCGTGTTGCGCGAGATCGGCCACGTATGGCCGA  
GCTGTGCGGCTCGCGTCTCGCTGCCAGCAGCAGATGGAGGGACTCCTGG

CCCCACACCGTCCCAAGGAGCCCGCCTGGTTCCTCGCCACCGTGGGTGTG  
TCCCAGATCACCAGGGCAAGGGCCTGGGCTCCGCCGTCGTTCTGCCGGG  
CGTCGAGGCCGCCGAGCGCGCTGGAGTCCCCGCCTTCCTGGAGACCTCG  
GCCCCCGTAACCTGCCCTTCTATGAGCGTCTGGGATTCACCGTCACCGCC  
GACGTTGAGGTTCCCGAGGGACCCCGCACCTGGTGCATGACCCGCAAGCC  
CGGTGCCTGAACGCGTCCGCTGATCAGCCTCGACTGTGCCTTCTAAGATCC  
AGACATGATAAGATACATTGATGAGTTTGGACAAACCACAACCTAGAATGCAG  
TGAAAAAATGCTTTATTTGTGAAATTTGTGATGCTATTGCTTTATTTGTAACC  
ATTATAAGCTGCAATAAACAAGTTAACAACAACAATTGCATTCATTTTATGTTT  
CAGGTTTCAGGGGGAGGTGTGGGAGGTTTTTTAAAGCAAGTAAAACCTCTAC  
AAATGTGGTATGGCTGATTATGATCAATAACTTCGTATAATGTATGCTATACG  
AAGTTATCAAGATCTGCTAGCATGGCACCCGGGAGAGCAGAACTCATTAGT  
GAGGAGGACTTGGGCAGTGGCAGTGGAGGAGAACAAGCTCATCTCGGA  
GGAGGACCTGGGTTCCGGCTCCGGCGGAGAACAGAAAGTTGATCTCGGAGG  
AGGACCTGGAATTCGAGGGCAGAGGAAGTCTTCTAACATGCGGTGACGTG  
GAGGAGAATCCCGGCCCTGCTAGTGGTAGCGGCAGCGGTAGCATGAACCG  
GGGAGTCCCTTTTAGGCACTTGCTTCTGGTGCTGCAACTGGCGCTCCTCCC  
AGCAGCCACTCAGGGAAAGAAAGTGGTGCTGGGCAAAAAAGGGGATACAG  
TGGAAGTACCTGTACAGCTTCCCAGAAGAAGTCCATACAATTCCACTGGAA  
AACTCCAACCAGATAAAGATTCTGGGAAATCAGGGCTCCTTCTTAAGTAAA  
GGTCCATCCAAGCTGAATGATCGCGCTGACTCAAGAAGAAGCCTTTGGGAC  
CAAGGAACTTCCCCCTGATCATCAAGAATCTTAAGATAGAAGACTCAGATA  
CTTACATCTGTGAAGTGGAGGACCAGAAGGAGGAGGTGCAATTGCTAGTGT  
TCGGATTGACTGCCAACTCTGACACCCACCTGCTTCAGGGGCAGAGCCTGA  
CCCTGACCTTGGAGAGCCCCCCTGGTAGTAGCCCCCTCAGTGCAATGTAGGA  
GTCCAAGGGGTAAAAACATACAGGGGGGGGAAGACCCTCTCCGTGTCTCAG  
CTGGAGCTCCAGGATAGTGGCACCTGGACATGCACTGTCTTGCAGAACCAG  
AAGAAGGTGGAGTTCAAAATAGACATCGTGGTGCTAGCTTTCCAGAAGGCC  
TCCAGCATAGTCTATAAGAAAGAGGGGGGAACAGGTGGAGTTCTCCTTCCCA  
CTCGCCTTTACAGTTGAAAAGCTGACGGGCAGTGGCGAGCTGTGGTGGCA  
GGCGGAGAGGGCTTCCTCCTCCAAGTCTTGATCACCTTTGACCTGAAGAA  
CAAGGAAGTGTCTGTAAAACGGGTTACCCAGGACCCTAAGCTCCAGATGGG  
CAAGAAGCTCCCGCTCCACCTCACCTGCCCCAGGCCTTGCCTCAGTATGC  
TGGCTCTGGAAACCTCACCTGGCCCTTGAAGCGAAAACAGGAAAGTTGCA  
TCAGGAAGTGAACCTGGTGGTGTGATGAGAGCCACTCAGCTCCAGAAAAATT  
GACCTGTGAGGTGTGGGGACCCACCTCCCCTAAGCTGATGCTGAGCTTGAA  
ACTGGAGAACAAGGAGGCAAAGGTCTCGAAGCGGGAGAAGGCGGTGTGG  
GTGCTGAACCTGAGGCGGGGATGTGGCAGTGTCTGCTGAGTGAAGTGGG  
ACAGGTCCTGCTGGAATCCAACATCAAGGTTCTGCCACATGGTCGACCCC  
GGTGCAGCCAATGGCCCTGATTGTGCTGGGGGGCGTCGCCGGCCTCCTGC  
TTTTATTGGGCTAGGCATCTTCTTCTGTGTGAGGTGCCGCCACACCGGCTA  
GGGATCCGTTGTTTAAACCCG

loxP sites, V5, T2A, puromycin resistance, 3xMYC, CD4

1. Heun P, Erhardt S, Blower MD, Weiss S, Skora AD, Karpen GH. Mislocalization of the *Drosophila* Centromere-Specific Histone CID Promotes Formation of Functional Ectopic Kinetochores. *Dev Cell* **10**, 303-315 (2006).
2. Boltengagen M, *et al.* A novel role for the histone acetyltransferase Hat1 in the CENP-A/CID assembly pathway in *Drosophila melanogaster*. *Nucleic Acids Res* **44**, 2145-2159 (2016).
3. Foltz DR, Jansen LE, Black BE, Bailey AO, Yates JR, 3rd, Cleveland DW. The human CENP-A centromeric nucleosome-associated complex. *Nat Cell Biol* **8**, 458-469 (2006).
