# Supplementary material for: Spt6 is a maintenance factor for centromeric CENP-A
Source: Springer Nature journal article supplement (doi:10.1038/s41467-020-16695-7), 2020-06-10
Supplement: MOESM4 [file 41467_2020_16695_MOESM4_ESM.pdf › 41467_2020_16695_MOESM4_ESM.pdf]

## Description of Additional Supplementary Files

### **File: Supplementary Table 1:**

List of primers, siRNAs, sgRNAs, and gBlock fragments including DNA sequences and list of all plasmids used.

### **File: Source Data**

Contains the tabulated data extracted from image quantification for histogram plots in Figures 1-3, 5,6, Supplemental Figures 2, 3 and the raw images for all immunoblots presented in Figures 2, 4, 6 and Supplemental Figures 2, 3.

### **File: FACS Gating Strategy**

Image exemplifies the FACS gating strategy.
